# Supplementary material
Source: publisher figshare collection journal article supplement (https://frontiersin.figshare.com/ndownloader/files/34385156)
Supplement: Supplementary file 1 [file 34385156]

Supplementary Material

Table 1. Range, mean and standard error of habitat variables recorded in Santiago de Chile.

| **Plot size** | **Variable** | **Range**  **(Min%-Max%)** | **Mean**  **(%)** | **SE** |
| --- | --- | --- | --- | --- |
| 50-m radius | Woody cover | 0-38 | 9.7 | 0.6 |
| 11-m radius | Tree cover | 0-60 | 18.8 | 1.2 |
|  | Shrub cover | 0-21 | 4.8 | 0.55 |
|  | Herbaceous cover | 0-60 | 11.3 | 0.99 |
|  | Impervious cover | 10-80 | 50.3 | 1.4 |
|  | Built cover | 0-60 | 17.6 | 1.6 |

Table 2. Results from Generalized Linear Models predicting the probability of occurrence of the Green-backed Firecrown hummingbirdby neighborhood socioeconomic level*.*

| **Socioeconomic level** | **Coefficient** | **SE** | ***P*** |
| --- | --- | --- | --- |
| High | 0.82 | 0.36 | 0.02 |
| Medium | -1.62 | 0.49 | 0.001 |
| Low | -2.61 | 0.57 | <0.001 |

Table 3. Results from Generalized Linear Models predicting the probability of occurrence of the Green-backed Firecrown hummingbirdaccording to habitat variables*.*

| **Variable** | **Coefficient** | **SE** | ***P*** |
| --- | --- | --- | --- |
| Intercept | -2.13 | 0.53 | <0.001 |
| Woody cover | 0.12 | 0.04 | 0.002 |
| Shrub cover | 0.099 | 0.04 | 0.01 |
| Herbaceous cover | 0.03 | 0.02 | 0.16 |
| Built cover | -0.03 | 0.01 | 0.065 |

Table 4. Results from mediation path analysis linking the occurrence of the Green-backed Firecrown hummingbirdto neighborhood socioeconomic level using woody and shrub cover as mediators. All predictive variables were standardized before analysis (see Methods in Main Manuscript). Goodness of fit indices: *X*2=2.35, *P*=0.125; SRMR=0.049.

|  | **Effect** | **Estimate** | **SE** | ***P*** |
| --- | --- | --- | --- | --- |
| *A. Mediation estimates* | Indirect – woody cover | 0.15 | 0.06 | 0.01 |
|  | Indirect – shrub cover | 0.09 | 0.04 | 0.05 |
|  | Direct | 0.41 | 0.14 | 0.004 |
|  | Total | 0.64 | 0.13 | <0.001 |
| *B. Path estimates* |  |  |  |  |
| Socioeconomic level | → woody cover | 0.52 | 0.1 | <0.001 |
| Socioeconomic level | → shrub cover | 0.26 | 0.09 | 0.005 |
| Woody cover | → hummingbird occurrence | 0.29 | 0.1 | 0.004 |
| Shrub cover | → hummingbird occurrence | 0.33 | 0.11 | 0.004 |
| Socioeconomic level | → hummingbird occurrence | 0.41 | 0.14 | 0.004 |
